1 **Gene Regulatory Divergence Between Locally Adapted Ecotypes in Their Native Habitats**

2

3

4 Billie A. Gould<sup>a,b</sup>, Yani Chen<sup>a</sup>, David B. Lowry<sup>a,c,d,\*</sup>

5

6 <sup>a</sup>Department of Plant Biology, Michigan State University, East Lansing, MI 48824, USA

7 <sup>b</sup>Counsyl Inc., South San Francisco, CA 94108, USA

8 <sup>c</sup>Program in Ecology, Evolutionary Biology and Behavior, Michigan State University, East

9 Lansing, MI 48824, USA

10 <sup>d</sup>Plant Resilience Institute, Michigan State University, East Lansing, MI 48824, USA

11

12

13 **Key words:** *Mimulus*, local adaptation, allele-specific expression, salt tolerance, chromosome

14 inversion

15

16 \*To whom correspondence should be addressed: David B. Lowry

17 Department of Plant Biology, Michigan State University, Plant Biology Laboratories, 612

18 Wilson Road, Room 166, East Lansing MI 48824, USA

19 Tel: (517) 432-4883

20 E-mail: [dlowry@msu.edu](mailto:dlowry@msu.edu)

21

22 **Running title:** Gene Expression Divergence in Nature

23 **ABSTRACT**

24 Local adaptation is a key driver of ecological specialization and the formation of new species.  
25 Despite its importance, the evolution of gene regulatory divergence among locally-adapted  
26 populations is poorly understood, especially how that divergence manifests in nature. Here, we  
27 evaluate gene expression divergence and allele-specific gene expression responses for locally-  
28 adapted coastal perennial and inland annual accessions of the yellow monkeyflower, *Mimulus*  
29 *guttatus*, in a field reciprocal transplant experiment. Overall, 6765 (73%) of surveyed genes were  
30 differentially expressed between coastal and inland habitats, while 7213 (77%) were  
31 differentially expressed between the coastal perennial and inland annual accessions. Further,  
32 18% of transcripts had significant genotype x site (GxE) effects. Habitat-specific differential  
33 expression was found for 62% of the GxE transcripts (differential expression in one habitat, but  
34 not the other), while only 94 (~5%) GxE transcripts had crossing reaction norms. *Cis*-regulatory  
35 variation was pervasive, affecting 79% (5532) of differentially expressed genes. We detected  
36 *trans* effects for 52% (3611) of differentially expressed genes. Consistent with the supergene  
37 hypothesis of chromosome inversion evolution, a locally adaptive inversion was enriched for *cis*-  
38 regulatory divergence. These results provide multiple new insights into the evolution of  
39 transcriptome-wide gene regulatory divergence and plasticity among locally adapted populations.

40

41

42

43

44

45

## 46 INTRODUCTION

47 One of the most important forces driving the evolution of ecological specialization and the origin  
48 of biodiversity is local adaptation (Clausen 1951; Colosimo et al. 2005; Sobel et al. 2010). Local  
49 adaptation is characterized by reciprocal home-site advantage, whereby populations perform best  
50 in their home habitat while performing poorly in foreign habitats (Kawecki & Ebert 2004;  
51 Hoekstra et al. 2006; Hereford 2009; Wadgymar et al. 2017). Numerous reciprocal transplant  
52 experiments have identified locally adapted populations (Leimu & Fisher 2008; Hereford 2009).  
53 Recently, reciprocal transplant experiments have been combined with genetic studies to quantify  
54 the role of individual loci adaptive divergence between local populations (Verhoeven et al. 2008;  
55 Gardner & Latta 2006; Lowry et al. 2009; Lowry & Willis 2010; Anderson et al. 2011, 2013;  
56 Leinonen et al. 2013; Ågren et al. 2013; Wadgymar et al. 2017). Despite this advance of  
57 integrating transplant experiments with modern genetic techniques, we have a very limited  
58 understanding of how gene expression divergence manifests between locally adapted populations  
59 in nature.

60

61 One very promising route for understanding how gene expression regulation evolves between  
62 locally adaptive populations is to conduct allele specific expression (ASE) analyses in natural  
63 populations (Tung et al. 2009; Lovell et al. 2016; Wang et al. 2017). By simultaneously  
64 evaluating different causes of gene expression, ASE analyses can determine the relative  
65 contributions of variation in nearby *cis* elements versus distant *trans* factors on gene expression  
66 divergence (Cowles et al. 2002; Wittkopp et al. 2004). Conducting ASE analyses in conjunction  
67 with reciprocal transplant experiments offers the opportunity go beyond partitioning gene  
68 expression into *cis* and *trans* effects by establishing how habitat context influences those sources

69 of variation in gene expression. ASE analysis is often conducted in F1 hybrids, where parental  
70 alleles are evaluated for significant differences in expression (de Meaux et al. 2005; Guo et al.  
71 2008; Zhang & Borevitz 2009; Cubillos et al. 2014; Coolon et al. 2014; Steige et al. 2015, 2017;  
72 Lovell et al. 2016; Aguilar-Rangel et al. 2017). ASE relies on there being nucleotide  
73 polymorphisms between parental alleles, so that those alleles can be individually counted in the  
74 F1 transcript pool. *Cis*-regulatory allelic expression differences are expected to persist regardless  
75 of whether alleles are expressed separately in parental genotypes or together in an F1 hybrid. In  
76 this way, ASE allows for the identification of *cis* expression Quantitative Trait Loci (eQTL),  
77 which can be evaluated for their responses to different environmental conditions (Lovell et al.  
78 2016). Further, *trans* effects on gene expression are indicated by a change in allelic effects  
79 between the parental generation and the F1 hybrids (Cowles et al. 2002; Wittkopp et al. 2004).  
80 Despite its great potential, we are unaware of any field reciprocal transplant experiment that has  
81 measured ASE to evaluate how gene expression divergence manifests across the habitats known  
82 to be responsible for local adaptation.

83  
84 In this study, we evaluated gene regulatory divergence in nature between locally adapted coastal  
85 perennial and inland annual population accessions of the yellow monkeyflower, *Mimulus*  
86 *guttatus* (*syn. Erythranthe guttata* (Fisch. ex DC.) G.L. Nesom). *M. guttatus* is a model system  
87 for understanding the genetic underpinnings of evolutionary adaptations (reviewed in Wu et al.  
88 2008; Twyford et al. 2015). Both annual and perennial populations are found throughout much of  
89 the range of *M. guttatus* (van Kleunen 2007; Lowry & Willis 2010; Friedman & Willis 2013;  
90 Oneal et al. 2014; Twyford et al. 2015). The large differences in morphology and life-history  
91 among populations of *M. guttatus* has been shown to be genetically-based through common



92 garden experiments (Vickery 1952; Hall & Willis 2006; Lowry et al. 2008; Lowry & Willis  
93 2010). In the inland Mediterranean climates of California's Coast Range and Sierra Foothills,  
94 most populations of *M. guttatus* have an early flowering annual life-history, which they have  
95 evolved to escape from the hot summer drought endemic to these regions. In contrast, coastal  
96 populations of *M. guttatus* are sheltered from the summer drought by pervasive marine fog,  
97 which supplies soil moisture and reduces transpiration rates (Corbin et al. 2005). As a result,  
98 coastal populations uniformly have a late-flowering perennial life-history (Hall & Willis 2006;  
99 Lowry et al. 2008). While coastal habitats are benign in terms of soil water availability, these  
100 populations must contend with toxic oceanic salt spray, in response to which they have evolved  
101 high salt tolerance (Lowry et al. 2008, 2009; Selby et al. 2014). Across previous reciprocal  
102 transplant field experiments, inland plants survived to flower at 23.9 times the rate of coastal  
103 plants in inland habitat, while coastal plants have survived at 2.5 times the rate of inland plants in  
104 coastal habitat (Hall & Willis 2006; Lowry et al. 2008, 2009; Hall et al. 2010).

105  
106 Population structure analysis has repeatedly demonstrated that coastal populations, all of which  
107 are perennial, collectively constitute a single ecotype that is genetically distinct from inland  
108 populations of the species (Lowry et al. 2008; Twyford & Friedman 2015). The individual genes  
109 responsible for the divergence of coastal perennial and inland annual populations are unknown,  
110 but it is clear that a large paracentric chromosomal inversion on chromosome 8 is responsible for  
111 much of the divergence in traits and fitness between these populations (Lowry & Willis 2010;  
112 Friedman 2014; Oneal et al. 2014; Gould et al. 2017). Smaller effect loci across the genome also  
113 account for divergence between the coastal perennial and inland annual populations (Hall et al.  
114 2006, 2010; Lowry et al. 2009; Friedman et al. 2015). The chromosome 8 inversion is also

115 involved in the divergence of inland annual populations from inland perennial populations  
116 (Lowry & Willis 2010). Divergence of inland annual and perennial populations was not a focus  
117 of this study.

118

119 The primary goal of our study was to characterize gene regulatory divergence between coastal  
120 perennial and inland annual *M. guttatus* in the natural habitats that drove the evolution of local  
121 adaptation among these ecotypes. In particular, our study aimed to 1) determine the prevalence  
122 of genotype x environment (GxE) interactions affecting the expression of native and non-native  
123 alleles across the divergent habitats, 2) characterize the relative contributions of *cis* and/or *trans*  
124 regulatory variation in expression divergence, 3) establish the role of genome structure (e.g.  
125 inversions) in the evolution of potentially locally adaptive regulatory variation, and 4) identify  
126 candidate genes underlying local adaptation in this system. The results of our study provide new  
127 insights into the gene regulatory evolution and suggest that coupling allele-specific expression  
128 with reciprocal transplant experiments is a promising approach for modern local adaptation  
129 research.

130

## 131 **MATERIALS AND METHODS**

### 132 ***Germplasm***

133 Original field collections of the seeds used in this experiment were made in the Spring of 2005  
134 from the SWB (N39.0359°, W123.6904°) and LMC (N38.8640°, W123.0839°) populations  
135 located in Mendocino County, California. The SWB and LMC populations have been the subject  
136 of extensive research since then (Lowry et al. 2008; Lowry & Willis 2010; Wu et al. 2010;  
137 Friedman & Willis 2013; Friedman 2014; Gould et al. 2017). Seeds from these populations were

138 inbred for multiple generations in the Duke University Greenhouses. The plants used for the field  
139 experiment included the following: 1) An inbred (7 generations self-fertilized) inland line, LMC-  
140 L1-2, henceforth referred to as LL; 2) An inbred (13 generation self-fertilized) coastal line,  
141 SWB-S1-2, henceforth referred to as SS; and 3) An F1 hybrid between the two inbred lines,  
142 henceforth referred to as F1 or SL. The F1s used in this experiment were made in the Michigan  
143 State University (MSU) Growth Chamber Facilities through a cross between the two parental  
144 inbred lines.

145

#### 146 ***Field Reciprocal Transplant Experiment***

147 We conducted a field reciprocal transplant experiment in tandem with allele-specific expression  
148 analyses to understand the causes (*cis*, *trans*) of gene expression divergence between locally  
149 adapted coastal perennial and inland annual populations of *M. guttatus* (Fig. 1). The reciprocal  
150 transplant experiment was conducted in 2016 using one coastal (Bodega Marine Reserve;  
151 N38.3157', W123.0687') and one inland (Pepperwood Preserve; N38.5755', W122.7008') field  
152 site located in Sonoma County, CA. SS, LL, and F1 seeds were originally sown in Sun Gro  
153 Metromix 838 soil on February 3. The seeds were then stratified in the dark at 4°C until  
154 February 9, when they were removed from the cold and germinated in the UC Berkeley Oxford  
155 Track Greenhouses. Seedlings were moved to the Bodega Marine Reserve Greenhouses on  
156 February 21 for acclimation. On February 22, the seedlings were transferred to native soil  
157 collected from the field sites. Seedlings were planted in the field at Bodega on March 7 and at  
158 Pepperwood on March 8. ~90 plants per type (SS, LL, F1) were planted at each field site. Plants  
159 were evenly distributed among three blocks per field site and randomized within block. Tissue  
160 for RNA sequencing was collected from Bodega on April 23 and Pepperwood on April 24. To

161 avoid effects of circadian rhythm on gene expression, all tissue was collected between 12:00pm  
162 and 1:00pm. Both collection days had mostly clear skies, with mean local temperatures during  
163 collection periods of 14° C at Bodega and 17° C at Pepperwood. Plants had progressed to  
164 different developmental stages at the time of collection, with some plants approaching flowering  
165 and others not. To best standardize tissue collection across genotypes, only the two youngest  
166 pairs of fully expanded leaves were collected from each plant. Tissue was immediately flash  
167 frozen on liquid nitrogen in the field. Samples were then shipped on dry ice to Michigan State  
168 University for RNA extractions.

169

### 170 *RNA-sequencing*

171 Total RNA was extracted from 80 leaf tissue samples with the Spectrum Plant Total RNA Kit  
172 (Sigma-Aldrich, St. Louis, MO, USA). RNA was extracted from 12 replicates of both SS and LL  
173 parental lines from the coastal field site and 13 replicates of both parental lines from the inland  
174 field site. RNA from 15 F1 hybrids from each site was also extracted. Total RNA was submitted  
175 for library preparation and sequencing at the MSU Genome Core  
176 (<https://rtsf.natsci.msu.edu/genomics/>). RNA-Seq libraries were prepared using the Illumina  
177 TruSeq Stranded mRNA Library Preparation Kit with a Perkin Elmer (Waltham, MA) Sciclone  
178 NGS robot. Completed libraries were quality controlled and quantified using a combination of  
179 Qubit dsDNA HS (Thermo Fisher Scientific, Waltham, MA), Caliper LabChipGX HS DNA  
180 (Perkin Elmer, Waltham, MA), and Kapa Biosystems Illumina Library Quantification qPCR  
181 (Wilmington, MA) assay kits. All libraries were barcoded and library concentrations were  
182 normalized and pooled in equimolar amounts: 8 pools each consisting of 10 randomly chosen  
183 libraries were made. Each of these pools was loaded on one lane of an Illumina HiSeq 2500 High

184 Output flow cell (v4) and sequenced in the 1x100bp (SE100) format using HiSeq SBS reagents  
185 (also v4). Base calling was done by Illumina Real Time Analysis (RTA) v1.18.64 and output of  
186 RTA was demultiplexed and converted to Fastq format with Illumina Bcl2fastq v1.8.4.

187

### 188 ***Reference Transcriptome Assembly***

189 Alignment of RNA-seq to a single reference genome can lead to major biases in ASE studies  
190 (Stevenson et al. 2013). To overcome reference bias, we assembled reference transcriptomes for  
191 the coastal perennial (SS) and inland annual (LL) parents. We chose this method over  
192 construction of a pseudo-transcriptome reference (Shen et al. 2013) to avoid generating bias  
193 caused by the reference genome and transcriptome for *M. guttatus*, which was assembled from  
194 an inland annual line (IM62; Hellsten et al. 2013). Reference bias is of particular concern in *M.*  
195 *guttatus* because pairwise polymorphism is generally high ( $\pi_s = 0.033-0.065$ ; Brandvain et al.  
196 2014; Gould et al. 2017; Puzey et al. 2017). To generate a reference transcriptome assembly that  
197 contained allele-specific sequences for each parental genotype, we sequenced and conducted *de*  
198 *novo* assembly using RNA-sequencing. Plants of each of the coastal (SS) and inland (LL) lines  
199 were grown in the MSU greenhouses until both genotypes were flowering. Floral bud, leaf, and  
200 root tissue were collected from each of the SS and LL lines, flash frozen with liquid nitrogen,  
201 and stored at  $-80^\circ\text{C}$ . Total RNA was extracted from each sample using the Spectrum Plant Total  
202 RNA Kit and submitted to the MSU Genome Core for library construction and sequencing.  
203 Strand-specific Tru-Seq Illumina RNA-seq libraries were prepared and sequenced along with  
204 four libraries constructed from field collected leaf tissue from the reciprocal transplant  
205 experiment (one sample per parental line per field site). These libraries were included in the  
206 transcriptome assembly pipeline to capture sequences from genes that may only be expressed

207 under field conditions. Completed libraries were quality controlled and quantified using a  
208 combination of Qubit dsDNA HS, Caliper LabChipGX HS DNA, and Kapa Biosystems Illumina  
209 Library Quantification qPCR assay kits. A total of 10 libraries were barcoded with dual index  
210 barcodes and pooled together. The entire pool was sequenced using 125 bp paired-end reads on a  
211 single lane of the Illumina GA 2500 platform.

212  
213 Raw output reads were quality checked using FastQC v.0.11.3 (Andrews 2015). Residual adapter  
214 sequences were removed and reads were quality trimmed using Trimmomatic v.0.33 (Bolger et  
215 al. 2014), discarding sequences less than 50 bp in length. Paired and un-paired reads from each  
216 ecotype were combined and assembled into two separate *de novo* (non-reference guided)  
217 assemblies using Trinity v20140413p1 (Grabherr et al. 2011) with *in silico* read normalization.  
218 To check the quality of our two transcriptomes, we compared our *de novo* assemblies to the set  
219 of primary transcripts from the IM62 reference transcriptome using Trinity utility scripts. We  
220 measured how much of each *Mimulus* primary transcript was reconstructed in the two  
221 assemblies. We found that 74.3% of *Mimulus* primary transcripts were reconstructed (to at least  
222 50% of their full length) in the inland parent (L) transcriptome. In the coastal parent  
223 transcriptome, 74.1% of *Mimulus* primary transcripts were reconstructed (to at least 50% of their  
224 full length). Thus, the two assembled transcriptomes were of similar quality and completeness.  
225 We aligned the filtered input reads back to the finished assemblies using Bowtie2 (Langmead et  
226 al. 2012). A total of 98.98% and 99.26% of input reads aligned back to the inland (L) and coastal  
227 (S) assemblies, respectively. We identified possible non-plant contaminant sequences in each  
228 assembly through comparison to the NCBI nt database using blastn. We eliminated  
229 transcriptome sequences with top blast sequence matches (e-value cutoff of 1e-20) to non-plant

230 organisms ( $N = 16,243$  and  $N = 1,222$  eliminated sequences for the inland and coastal  
231 transcriptomes, respectively).

232

233 To construct a combined reference transcriptome that contained pairs of allelic sequences from  
234 both lines, we used a reciprocal best blast strategy. Each transcriptome was compared against the  
235 other (blastn) at an e-value cutoff of  $1e-5$  and reciprocal best hits were returned using a custom  
236 Python (v. 2.7.2) script ([https://github.com/lowrylab/Mimulus\\_Gene\\_Expression](https://github.com/lowrylab/Mimulus_Gene_Expression)). We tested a  
237 range of e-value cutoffs in this analysis and found that the choice of e-value between  $1e-5$  and  
238  $1e-50$  had little effect on the total output number of best blast pairs (see Fig. S1). We considered  
239 two sequences best blast hits if total high-scoring pair (HSP) coverage was 75% or greater  
240 between sequences. We included only aligned sequence regions of the longest HSP in the  
241 combined transcriptome.

242

243 To match transcripts in the combined *de novo* reference transcriptome with their corresponding  
244 *Mimulus* genes, we compared *de novo* assembled alleles against the reference (IM62) set of  
245 primary transcripts (blastn) at an e-value cut-off of  $1e-5$ . In rare cases, where two alleles from a  
246 *de novo* assembled transcript matched different *Mimulus* genes, the gene with the lowest e-value  
247 alignment was chosen as a match for the allele pair. Note that with this annotation method, each  
248 *de novo* assembled transcript has only one matching gene and thus, can be unambiguously  
249 assigned a specific location in the genome. However, multiple transcripts can be assigned to the  
250 same genomic location, which is typical of isoforms stemming from the same gene.

251

252 ***Differential Expression Analyses***

253 Raw reads from the 80 field RNA-seq libraries were de-multiplexed, quality filtered, and  
254 trimmed using FastQC and Trimmomatic, as described above for the transcriptome assembly.  
255 Filtered reads were aligned to the *de novo* combined reference transcriptome (described above)  
256 using the un-gapped aligner Bowtie v1.0.0 (Langmead et al. 2009). We outputted only unique  
257 alignments with zero mismatches. In this way, we analyzed only read count data for reads that  
258 aligned uniquely and perfectly to only one parental allele in the combined reference  
259 transcriptome. Only reads that overlap one or more polymorphisms between the parental alleles  
260 provide useful information on differential expression between alleles. Approximately 52% of  
261 reads per individual had one or more than one alignment to the transcriptome. Unaligned reads  
262 fall mainly in areas that were not reconstructed in the reference transcriptomes. On average  
263 28.6% of library reads per individual aligned uniquely to only one allele and were thus,  
264 informative for allele-specific expression (range 23.7 – 30.7%). For confirmation, some  
265 alignments were visually checked using IGV v.2.3.65 (Thorvaldsdóttir et al. 2013).  
266  
267 Read alignments to each transcript were quantified using a custom Python (v.2.7.2) script. Using  
268 the raw count data, we identified allele pairs in the transcriptome for which there was a high  
269 probability of residual heterozygosity in one of the parental inbred lines. Potential regions of  
270 residual heterozygosity were indicated when a significant number of reads from a homozygous  
271 parent aligned to the opposite parental allele in the transcriptome. We eliminated from further  
272 analysis transcripts where the average number of reads aligning to the correct parental allele was  
273 less than 5 times the average number of reads aligning to the alternate allele ( $N = 2255$   
274 eliminated transcripts). For example, we eliminated transcripts where the SS parental line did not  
275 have at least 5 times more reads aligning to the S allele than the L allele in the reference



276 transcriptome. We also used the initial count data to test for mapping bias (Fig. S2). For both  
277 field sites, mapping bias was present but well controlled. On average there were 1.9% more reads  
278 aligned to the S allele than the L allele for F1 plants (Fig. S3). There was a small but statistically  
279 significant relationship between transcript nucleotide divergence and differential expression  
280 (equivalent to 0.001 increase in the absolute value of LFC between genotypes, per SNP). Count  
281 data was normalized for library size using Trimmed Mean of M-values (TMM) normalization to  
282 counts per million, which reduces biases generated by the presence of very highly and lowly  
283 expressed transcripts (Robinson et al. 2010). We eliminated any transcript without at least one  
284 library containing  $\geq 10$  counts per million reads. The remaining sequences constitute the  
285 ‘expressed’ set of transcripts ( $N = 10,122$ ). The mean expressed library size for samples from the  
286 coast and inland sites was not significantly different ( $t$ -tests: all libraries,  $P = 0.60$ ; parental  
287 libraries only,  $P = 0.22$ , Fig. S4, and is thus, unlikely to strongly affect statistical comparisons  
288 between the two sites. Only 2 transcripts were expressed at only one site and only 7 transcripts  
289 were expressed by only one parental line.

290

291 We analyzed the expressed transcript data using the limma (Ritchie et al. 2015) and edgeR  
292 (Robinson et al. 2010) packages in R v.3.2.1 (R. Core Team 2012). Variance stabilizing  
293 normalization of the data was performed using the voom (Law et al. 2014) function in limma,  
294 with a design matrix corresponding to the particular linear model being used for analysis. Model  
295 design matrices were coded using the default treatment-contrast parameterization scheme (see  
296 Smyth et al. (2015), section 9.5.4) and the significance of model effects were calculated using  
297 voom precision weights and the eBayes function. Model effects were judged significant if they

298 fell below a Benjamini-Hoechberg false-discovery rate corrected  $P$ -value of 0.05 using the  
299 `decideTests` function.

300

301 We used several different linear models to analyze the count data for expressed transcripts,  
302 modified from the method of Lovell et al. (2016). For this approach, it is important that the size  
303 of the L and S sub-transcriptome in each F1 is approximately equal to produce unbiased results,  
304 which we verified independently (Fig. S3). Each linear model had one or more fixed factors:  
305 allele (L/S), environment (coastal field site vs. inland field site), generation (F0/F1), and  
306 interaction terms. We analyzed the parental plants (F0 generation) separately, the F1 plants  
307 separately, and both generations together in different models. We avoided analyzing models with  
308 more than one categorical factor, except for the purposes of measuring interaction effects  
309 because effect significance testing for crossing categorical factors only captures differences  
310 present in the first level of each factor.

311

312 For data from the F0 plants, we ran models examining the allele (homozygous genotype) effect  
313 within each environment separately. We also tested for environmental effects separately within  
314 each parental genotype. We used a model with both genotype and environment to test the  
315 significance of the genotype x environment interactions. Because the inland site had one extra  
316 plant per genotype compared with the coastal site, we analyzed data from 12 randomly chosen  
317 parental lines of each genotype to equalize the power to detect effects between sites. A *post-hoc*  
318 power analysis was conducted using the R package *RnaSeqSampleSize* (Bi & Liu 2016).

319

320 We used data from all plants together (both F0 and F1) to test for *cis* and *trans* regulation. *Cis*-  
321 regulatory allelic expression differences are expected to persist regardless of whether alleles are  
322 expressed separately in parental genotypes or together in an F1 hybrid. However, in the F1  
323 genotype, *trans* acting factors from both parental genotypes will influence the expression of an  
324 allele, so *trans* regulation is indicated if allelic patterns of differential expression are different in  
325 the parents vs. the F1 plants. In our model, a significant effect of allele is indicative of a *cis*-  
326 regulatory difference in expression. Within each environment, we tested a model with the  
327 following factors: allele (genotype), generation (F0/F1), and the interaction term. Any transcript  
328 with any *cis* regulation had a significant allele effect (measured in the F1 generation only). Any  
329 transcript with only *trans* regulation had a significant difference between generations, but a non-  
330 significant allele effect in the F1 generation. Any transcript with both *cis* and *trans* regulation  
331 had a significant generational effect and a significant allele effect in the F1.

332

333 To gauge the significance of *cis* x environment interactions, we tested the interaction term of a  
334 model using only F1 data and the factors allele, environment, and interaction. To gauge the  
335 significance of *trans* x environment interactions, we modeled all the data (F0 and F1) and  
336 measured the significance of a three-way interaction term: allele x generation x environment.

337

### 338 ***Gene Ontology Enrichment and Expression Networks***

339 We tested for enrichment of gene-ontology (GO) terms among subsets of genes with particular  
340 expression patterns (significant model effects). To annotate GO terms, all IM62 reference  
341 *Mimulus* proteins were paired with their best *Arabidopsis* protein matches (blastp) at an e-value  
342 cutoff of  $10^{-3}$ . The set of expressed transcripts in our study was matched to the IM62 reference

343 genome genes, as described above, and corresponding GO terms were matched to the  
344 *Arabidopsis* BLAST hits. Subsequent GO enrichment tests were done using the R  
345 BIOCONDUCTOR package topGO (Alexa & Rahnenführer 2015). We used the Bioconductor  
346 database ‘org.At.tair.db’ for annotation and the algorithm ‘classic’ (statistic = ‘fisher’) for  
347 statistical tests. Because *P*-value distributions of GO enrichment tests do not typically conform to  
348 a distribution amenable to Benjamini-Hoechberg FDR control, and because such control methods  
349 can be overly conservative causing loss of valuable functional information (Alexa &  
350 Rahnenführer 2015), we report GO terms with uncorrected enrichment *P*-values  $\leq 0.01$  (Table  
351 S1). Enrichment tests were conducted at the level of genes rather than transcripts. For each gene  
352 in the IM62 reference transcriptome, we determined the model effects for all matching expressed  
353 transcripts in our data set. A model effect for a gene was considered significant if at least one  
354 matching transcript had a significant effect. GO enrichment was then tested among all expressed  
355 genes ( $N = 9326$ ) with a significant effect vs. all expressed genes without a significant effect.  
356 Enrichments for GxE effects were measured against all genes where either environmental or  
357 allelic DE could be detected. Reaction norm plots were generated using the LSMeans expression  
358 level of all transcripts for each gene in each environment.

359  
360 We conducted weighted gene co-expression network analysis within each parental genotype  
361 using the R package WGCNA (Langfelder et al. 2008). The analysis identifies genes with  
362 correlated patterns of expression across individuals (eigengenes), finding gene sets that  
363 putatively form molecular networks (or modules). We conducted WGCNA separately for each  
364 parental genotype and then identified which networks in each parent had expression that was  
365 significantly different between field sites. Gene expression was quantified as the expression level

366 of the longest matching transcript for each gene. For all analyses, we calculated dissimilarity of  
367 expression using a soft thresholding power of 6 and used the dynamicTreeCut function to define  
368 modules with a minimum number of 30 genes. We calculated the correlation of each cluster  
369 (eigengene) with habitat (Fig. S5). Gene ontology term enrichment was calculated for all  
370 modules with a correlation value of  $r > 0.75$  (Table S2).

371

### 372 *Chromosomal Inversion Analyses*

373 Two inverted regions of the genome, one on chromosome 5 and one on chromosome 8, have  
374 been linked to adaptive differences between inland and coastal ecotypes in previous studies  
375 (Lowry & Willis 2010; Oneal et al. 2014; Twyford & Friedman 2015; Gould et al. 2017). When  
376 examining genes in putatively inverted regions of the genome, we included reference genome  
377 v1.1 scaffolds that are inferred to be in the inverted regions from a previous linkage mapping  
378 study (Holeski et al. 2014). For the inversion on chromosome 5, we included v1.1 scaffolds 36,  
379 149, 158, 170, 197, 266, 281, 288, 327, and 368. For the inversion on chromosome 8, we  
380 included v1.1 scaffolds 11, 59, 76, 155 233, 604, and 1093. We tested whether genes in these  
381 regions of the genome are enriched for any model effects. Enrichment tests of model effects  
382 among annotated inversion and non-inversion genes were carried out using Fisher's Exact tests.  
383 The magnitude of model effects among genes with significant effects were compared using  
384 Wilcox rank sum tests in R. It should be noted that the presence of alternative orientations of  
385 chromosome 8 inversion in the SS and LL parental lines has been confirmed by previous crosses  
386 (Lowry & Willis 2010) while the chromosome 5 inversion was originally identified in a cross  
387 between different inland and coastal lines (Holeski et al. 2014). High differentiation between the

388 SS and LL parental lines in both inversion regions has been demonstrated by an allele frequency  
389 outlier analysis (Gould et al. 2017).

390

### 391 ***Patterns of Candidate Gene Expression***

392 In a study of species-wide genomic variation, Gould et al. (2017) identified a set of 667  
393 candidate adaptation genes. These genes had unusually high differentiation in allele frequencies  
394 between a set of 47 coastal and 50 inland *Mimulus* populations. High differentiation was detected  
395 in either the genic or 1 kb upstream promoter regions of the genes, or both. We tested for  
396 enrichment of differential expression patterns among the expressed candidate genes in the  
397 current study. Enrichment was tested against all expressed non-candidate genes using Fisher's  
398 Exact tests. The magnitude of model effects among genes with significant effects were compared  
399 using Wilcox rank sum tests in R.

400

## 401 **RESULTS**

402

### 403 ***Reference Transcriptome Assembly***

404 From the tissues of the two *M. guttatus* parental lines we were able to reconstruct both parental  
405 alleles for 25,893 transcripts, of which 708 pairs were removed because they contained no  
406 polymorphism between lines. Eighty-two percent of transcripts could be matched back to  
407 previously annotated *M. guttatus* genes ([www.phytozome.org](http://www.phytozome.org)). Our transcriptome reconstructed  
408 54.0% of *M. guttatus* primary transcripts at 50% coverage or greater (Fig S5). On average, there  
409 were 2.8 polymorphisms (SNPs or indels) per 100 bp for each pair of alleles in the reference  
410 transcriptome (Fig. S6C).

411

## 412 *Differential Expression Analyses*

413 RNA-sequencing of plants from the field experiments produced approximately 25.9 million raw  
414 reads per library (range 9.2-35.9 million reads). We were able to evaluate gene expression for  
415 10,122 transcripts corresponding to 9,326 genes, after transcriptome reconstruction and filtering.  
416 Significant expression differences (FDR = 0.05) between the inland and coastal field sites were  
417 common (6765 genes; 73% of genes). Expression differences between parental genotypes within  
418 field sites were also common (7213 genes; 77%; Table 1 and 2). Most transcripts that were  
419 differentially expressed between parental lines were also sensitive to environment: only 7.2% of  
420 transcripts were consistently differentially expressed between lines regardless of field site. We  
421 found that 54% more genes were differentially expressed between parental lines at the inland site  
422 than at the coastal site (Table 2). We can attribute only part of this discrepancy to differences in  
423 power at the two sites. Average power to detect DE genes was only slightly higher at the inland  
424 site than the coastal site (75% vs. 68% for a minimum fold-change of 2X).

425

426 Genotype x site (GxE) interactions were relatively common. In total, 1837 transcripts  
427 (corresponding to 19% of expressed genes, Table 1, Table S3) had significant GxE interactions,  
428 where the magnitude of expression differences between parental ecotypes depended on the field  
429 site in which they were grown (Fig. 2A). Only 94 transcripts had crossing reaction norms (green  
430 points, Fig. 2B). More often, expression differences between genotypes were significant at one  
431 site and non-significant at the other (1137 transcripts, 11%, blue and red points, Fig. 2).

432

433 Most of the expression differences between the coastal and inland lines could be attributed to *cis*-  
434 regulatory variation: 79% (5532 genes) of differentially expressed genes had *cis* regulatory  
435 differences, while about half (3611 genes) of the differentially expressed genes had detectable  
436 *trans* effects (Fig. 3 & 4, Table 1). At both coastal and inland field sites, the magnitudes of *cis*  
437 and *trans* regulatory differences were similar (Table S4). However, we detected far more  
438 significant *trans* effects in the inland field site than the coastal field site (Fig. 3 & 4, Table S4).  
439 Overall, there was only moderate overlap between the sets of *cis*-regulated transcripts from the  
440 two environments (Fig. S7). The same was true for the sets of *trans*-regulated transcripts from the  
441 two environments.

442

#### 443 ***Gene Ontology Enrichment and Expression Networks***

444 We explored the functional significance of genes with differential expression between  
445 environments and between parental ecotypes. Differentially expressed genes in the coastal (SS)  
446 parent between sites were enriched for glycosinolate/glucosinolate/S-glycoside biosynthesis and  
447 metabolism, response to starvation, and others (Table S1). Differentially expressed genes in the  
448 inland parent (LL) between sites were enriched for GO categories related to cuticle development,  
449 meristem and floral development, and pigment production. Differentially expressed genes  
450 between the parental lines (across sites) were enriched for genes involved with cell wall  
451 formation, meristem initiation, and responses to viral pathogens. Genes with genotype x site  
452 (GxE) interactions had the most significantly enriched GO terms ( $N = 69$ ), including  
453 brassinosteroid biosynthesis/metabolism, cell wall formation, regulation of development, and  
454 pigment accumulation.

455



456 We used network clustering analysis to examine correlated expression of gene clusters (modules)  
457 within habitats for the coastal and inland lines (Pearson's correlation,  $r > 0.75$ , Fig. S5. The  
458 coastal perennial line (SS) preferentially expressed modules related to root and epidermal  
459 development at its home site, while oxidative stress response, chlorophyll metabolism, and  
460 circadian rhythm modules were highly expressed in inland habitat (Table S2). The inland annual  
461 line preferentially expressed gene clusters related to nucleoside catabolism, sugar and starch  
462 metabolism, pigment accumulation, and photoperiodism at the inland field site, but had no  
463 modules strongly associated with the coastal field site.

464

#### 465 ***Chromosomal Inversion Analyses***

466 Chromosomal inversions are thought to act as adaptation supergenes that hold together long  
467 haplotypes containing multiple adaptive polymorphisms through suppressed recombination  
468 (Kirkpatrick 2010; Joron et al. 2011; Thompson & Jiggins 2014). We were thus interested in  
469 evaluating the hypothesis of whether the known inversions in this system hold together  
470 haplotypes of differentially expressed genes. There were significantly more differentially  
471 expressed genes inside the chromosome 5 inversion than expected by chance and there were  
472 significantly more GxE interactions for genes in this inversion (Table 1). The adaptive (Lowry &  
473 Willis 2010) chromosome 8 inversion also had significantly more differentially expressed genes,  
474 but only at the coastal site (Table 2). Interestingly, the chromosome 8 inversion had a significant  
475 enrichment of *cis*-eQTLs (Table 1), suggesting that it may maintain a higher level of regulatory  
476 divergence caused by the evolution of *cis*-regulatory elements.

477

#### 478 ***Patterns of Candidate Gene Expression***

479 To identify genes putatively linked to local adaptation, we cross-referenced our results with a  
480 recent genomic outlier analysis, which identified 667 genes with a high level of allelic  
481 differentiation between coastal and inland populations (Lowry et al. 2010). We found that the  
482 magnitude of differential expression between environments was significantly elevated for  
483 candidate genes with highly differentiated SNPs (from Gould et al. 2017) in their promoter  
484 regions ( $P < 0.05$ , Table S5). The magnitude of differential expression between genotypes for  
485 candidate genes with differentiated promoters was also higher than for non-candidate genes, but  
486 not significantly so ( $P = 0.08$ ). Candidate genes with differentiated gene regions tended to have  
487 expression differences between lines or between environments that were lower in magnitude than  
488 non-candidate genes.

489  
490 We were able to examine gene expression in seven top candidate genes highlighted by the outlier  
491 analysis and/or previous QTL mapping studies (Fig. 5). The candidate gene *ABAI* codes for the  
492 first protein in the biosynthesis of the hormone abscisic acid, which controls responses to  
493 osmotic stress, including drought (Xiong et al. 2002). An *ABAI* (abscisic acid deficient 1)  
494 ortholog, Migut.H00431, is located within the chromosome 8 inversion and may contribute to  
495 inland ecotype's adaptation to low soil water availability. *ABAI* was always more highly  
496 expressed in the inland line and was upregulated in both lines at the inland field site (Fig. 5A).  
497 Previously, we showed that coastal *M. guttatus* populations have evolved leaf tissue tolerance to  
498 oceanic salt spray (Lowry et al. 2009). Leaf salt tolerance is generally mediated by a  $\text{Na}^+/\text{H}^+$   
499 antiporter (*SOS1*; Qiu et al. 2002), which is potentially activated by a calcium sensor (*CBL10*;  
500 Kim et al. 2007). Both *SOS1* (Migut.E00570) and *CBL10* (Migut.A00138) were more highly

501 expressed in the coastal line than the inland line across habitats (Fig. 5B, C), a pattern consistent  
502 with elevated salt tolerance of coastal populations.

503

## 504 **DISCUSSION**

505 Overall, our results identified multiple key patterns regarding the relationship between gene  
506 expression and the evolution of local adaptation. Differential expression is substantial between  
507 locally-adapted accessions in nature. Expression plasticity of alleles across habitats (genotype x  
508 environment interactions) appear to be common and may minimize fitness trade-offs at  
509 individual loci that contribute to the overall pattern of local adaptation. A large portion of that  
510 differential expression is due to *cis*-regulatory divergence. Chromosomal inversions appear to act  
511 as supergenes by holding together haplotypes of differentially expressed genes, but this pattern  
512 depends on habitat context. We discuss each of these major findings as well as the limitations  
513 and caveats associated with our study in detail below.

514

### 515 ***Sources of Variation in Gene Expression***

516 One of the major outstanding questions in local adaptation research is why the fitness effects of  
517 individual loci on local adaptation are so often asymmetric across habitats. Theoretical models  
518 (Levene 1953; Hedrick 1976, 1986; Dieckmann & Doebeli 1999) and studies in key model  
519 systems (Abzhanov et al. 2004; Hoekstra et al. 2006; Barrett et al. 2009) have suggested trade-  
520 offs at individual loci (e.g. antagonistic pleiotropy) to be common. However, field reciprocal  
521 transplant experiments and experimental evolution studies have often found a pattern of  
522 conditional neutrality, where loci have a strong effect on fitness in one environment but have an  
523 undetectable effect on fitness in alternative environments (reviewed in Bono et al. 2017;

524 Wadgyamar et al. 2017). This pattern has also been found in the coastal perennial/inland annual  
525 *M. guttatus* system, where three salt tolerance QTLs have fitness effects in coastal habitat but no  
526 detectable effects in inland habitat (Lowry et al. 2009). While a failure to statistically detect a  
527 trade-off across habitats does not rule out the possibility of a small trade-off for an individual  
528 locus, it does suggest that adaptive loci are often strongly asymmetric in their fitness effects  
529 across habitats.

530

531 Gene regulatory divergence between locally adapted populations is one possible mechanism by  
532 which trade-offs could be minimized across habitats for individual loci (Rutherford 2003;  
533 Ghalambor et al. 2007; Des Marais et al. 2013, 2017; Dayan et al. 2015; Lohman et al. 2017).

534 While some gene regulatory differences between ecotypes may evolve due to genetic drift in  
535 isolated populations, adaptive phenotypic plasticity can evolve due to natural selection.

536 Adaptations of organisms to maintain homeostasis when faced by environmental challenges can  
537 be caused by genotype specific changes in gene expression (Gibson 2008; Des Marais et al.

538 2017). However, such environmentally dependent changes in gene expression would not be

539 expected to result in a cost if gene expression did not differ among genotypes in habitats that

540 lacked particular environmental stresses. In our study, we identified 1137 transcripts that were

541 differentially expressed between the coastal perennial and inland annual lines in one habitat

542 (coast or inland) but did not show the same expression difference in the alternative habitat (GxE

543 transcripts, Fig. 2). In contrast, fewer transcripts (733) had the same expression difference

544 between ecotypes regardless of environment (G-only transcripts). For the current experiment, we

545 cannot definitively determine whether any of the GxE or G-only transcripts cause asymmetries in

546 fitness effects across habitats. Further, some of the genotype specific changes in gene expression

547 could potentially be maladaptive (Ghalambor et al. 2007). Even so, our results do clearly show  
548 that habitat-specific differential gene expression is common for locally adapted ecotypes. Future  
549 studies should focus on making the critical linkages between patterns of gene expression and  
550 fitness in the field to determine whether asymmetries of fitness effects across habitats are the  
551 result of habitat-specific differential gene expression.

552

553 Overall, *cis*-regulatory evolution was responsible for at least 79% of the differentially expressed  
554 genes. This is about twice the percentage of *cis*-regulated differentially expressed genes for  
555 crosses both within and between *Drosophila* species (Coolon et al. 2014). However, the  
556 relatively high proportion of *cis*-regulatory divergence underlying differentially expressed genes  
557 is not too surprising, given the high level of polymorphism among *M. guttatus* accessions  
558 (Brandvain et al. 2014; Gould et al. 2017; Puzey et al. 2017). Further, in terms of the proportion  
559 of *cis* regulated genes out of all genes surveyed (59% for our study), our results are not very  
560 different from other study systems. Mack et al. (2016) found significant *cis* effects for 68% of  
561 surveyed genes in crosses between house mice subspecies (*Mus musculus musculus* and *M. m.*  
562 *domesticus*). Steige et al. (2015) found that 33-39% of genes surveyed had significant allele-  
563 specific expression effects for hybrids between accessions of the plant *Capsella grandiflora*.

564

565 One striking pattern we observed in this study was a great deal more differential regulation  
566 between ecotypes in the inland environment than the coastal environment (Table 2, Fig.3). We  
567 can attribute only a small part of this difference to greater experimental power to detect  
568 differences at the inland site (75% inland vs. 68% coast, for transcripts with a minimum fold-  
569 change of 2X). Because mapping bias is well controlled in this study, we do not believe this

570 overall pattern is the result of an analytical artifact. We hypothesize that part of this difference is  
571 due to more stressful conditions experienced by plants at the inland site; plants that survive to  
572 maturity in coastal habitats are generally larger than plants growing at the inland habitat (Lowry  
573 et al. 2008; Popovic & Lowry *unpublished data*). It remains to be seen whether the magnitude of  
574 gene regulatory divergence between ecotypes varies across habitats in other systems as well.

575

### 576 ***Gene Regulatory Evolution and Chromosomal Inversions***

577 Chromosomal inversions have been thought to be involved in evolutionary adaptations since  
578 classic studies in *Drosophila* found that inversion polymorphisms are frequently correlated with  
579 environmental conditions over geographic space and through time (Dobzhansky 1951, 1970;  
580 Kirkpatrick & Barton 2006; Hoffman & Rieseberg 2008; Cheng et al. 2012; Ayala et al. 2013,  
581 2014; Adrion et al. 2015). Inversions strongly suppress genetic recombination in heterokaryotic  
582 (inversion heterozygotes) individuals because recombinant gametes are unbalanced (Dobzhansky  
583 1970; Rieseberg 2001). Researchers have thus hypothesized that inversions could act as  
584 supergenes by holding together long haplotypes containing multiple adaptive polymorphisms  
585 through suppressed recombination (Dobzhansky 1970; Joron et al. 2011; Thompson & Jiggins  
586 2014; Kirkpatrick & Barton 2006; Kirkpatrick & Barrett 2015).

587

588 The supergene hypothesis is a major reason why inversions are thought to frequently contribute  
589 to the evolution of adaptations (Dobzhansky 1970; Kirkpatrick & Barton 2006; Hoffman &  
590 Rieseberg 2008; Faria & Navarro 2009; Thompson & Jiggins 2014). Early researchers,  
591 especially Dobzhansky (1970), argued that inversions could hold together co-adapted epistatic  
592 complexes of genes through suppressed recombination. However, theoreticians have recently

593 shown that inversions can spread due to purely additive effects, when at least two locally  
594 adaptive loci are captured within the inverted region (Kirkpatrick & Barton 2006; Kirkpatrick &  
595 Barrett 2015). Regardless of the ultimate genetic mechanisms, these models all predict that  
596 suppression of recombination by inversions maintains adaptive divergence at multiple linked  
597 loci.

598

599 Global gene expression analyses offer one way to test whether inversions hold together  
600 haplotypes of genetic variation potentially responsible for phenotypic divergence between locally  
601 adapted populations. Research in a few systems has found evidence of increased levels of  
602 expression divergence in inversions (Marquès-Bonet et al. 2004; Cassone et al. 2011; Fuller et al.  
603 2016). For example, Marquès-Bonet et al. (2004) found 8.9% greater divergence (fold change) in  
604 human versus chimp brain gene expression for chromosomal inversions when compared to the  
605 rest of the genome. We did not observe a significant difference in fold change between inverted  
606 and non-inverted regions in our study. However, genes within the region of the chromosome 5  
607 inversion were 12.5% more likely to be differentially expressed. Genes within the adaptive  
608 chromosome 8 inversion were 8.3% more likely to have a *cis*-eQTL.

609

610 The enrichment of gene expression differences in our study is consistent with patterns found in  
611 inversions between chimpanzees and humans (Marquès-Bonet et al. 2004) and *Drosophila*  
612 (Fuller et al. 2016; Said et al. 2018), but contrasts with results for the plant *Boechera stricta* (Lee  
613 et al. 2017). While the finding of an enrichment of differential gene expression for inversions in  
614 this study and others is consistent with the supergene hypothesis of inversion evolution, it is by  
615 no means definitive proof. Demonstrating that an inversion has evolved as an adaptation

616 supergene requires confirmation that multiple genes within the inversion have effects on adaptive  
617 phenotypes (Hoffman & Rieseberg 2008; Kirkpatrick 2010; Kirkpatrick & Kern 2012). There is  
618 currently no study that we are aware of which has experimentally confirmed that two or more  
619 genes within an inversion contribute additively or epistatically to adaptive phenotypic  
620 differences between locally adapted populations, ecotypes, or species (but see Kunte et al. 2014).

621

### 622 *Candidate Genes and Pathways*

623 Analysis of expression across both ecotypes and environments allowed us to examine the  
624 detailed expression patterns of several candidate genes that may contribute to adaptive  
625 divergence. We observed a diversity of expression patterns across candidate genes (Fig. 5). The  
626 gene *ABAI* catalyzes the first step in the synthesis of the abiotic stress hormone ABA, and the  
627 *Mimulus* ortholog of this gene is located in the adaptive chromosomal inversion on chromosome  
628 8. In *Arabidopsis* and other plants, increased ABA production leads to drought tolerance by  
629 triggering stomatal closure and resistance to osmotic stress (Jakab et al 2005). Previous work has  
630 shown that the chromosome 8 inversion in *M. guttatus* contributes directly to fitness differences  
631 between coastal and inland lines (Lowry & Willis 2010) and that the genic region of *ABAI*  
632 within the inversion has an unusually high degree of differentiation (high  $F_{ST}$ ) between coastal  
633 and inland populations (Gould et al. 2017). In the present study, we found that both genotypic  
634 and environmental differential regulation contribute to expression patterns at this locus. *ABAI*  
635 was always more highly expressed in the inland ecotype and also upregulated in the inland  
636 environment by both ecotypes (Fig. 5A). In contrast, the candidate gene P-glycoprotein19,  
637 *PGP19* (Migut.H00909), also located in the adaptive chromosome 8 inversion (Gould et al.  
638 2017), was differentially regulated between ecotypes only at the inland field site (Fig. 5E). The



639 *Arabidopsis* ortholog of *PGP19* is an ATP transporter involved in gravitropism, growth, and  
640 development by mediating auxin signaling (Okamoto et al 2015).  
641  
642 Consistent with oceanic salt spray playing a key role in local adaptation (Lowry et al. 2009),  
643 multiple salt tolerance candidate genes were differentially regulated between the coastal  
644 perennial and inland annual ecotypes. Two major genes in the Salt Overly Sensitive (*SOS*)  
645 pathway, *CBL10* and *SOS1*, were expressed at higher levels in the coastal ecotype than the inland  
646 ecotype across habitats (Fig. 5B, C). *CBL10* is a calcineurin B-like calcium sensor that interacts  
647 with the protein kinase *SOS2* in the shoots of plants to positively regulate Na<sup>+</sup> transporters in the  
648 tonoplast of the vacuole as well as potentially in the plasma membrane (Quan et al. 2007; Kang  
649 & Nam 2016; Egea et al. 2018). The function of *CBL10* in salt response has been shown to be  
650 conserved across *Arabidopsis* (Quan et al. 2007), *Populus* (Tang et al. 2014), and tomatoes (Egea  
651 et al. 2018). Interestingly, *CBL10* has been found to confer salt tolerance in plants, while at the  
652 same time making them more susceptible to drought (Kang & Nam 2016), suggesting a potential  
653 trade-off for local adaptation to coastal habitats that are inundated by salt spray. *SOS1* is a well  
654 characterized Na<sup>+</sup>/K<sup>+</sup> antiporter that pumps toxic Na<sup>+</sup> ions out of the cytoplasm of plant cells into  
655 the surrounding apoplast (Shi et al. 2002). *SOS1* is potentially positively regulated by the  
656 *CBL10/SOS2* complex in the shoots of plants (Quan et al. 2007). In addition to the *SOS* pathway,  
657 there were G and E effects (but not GxE) for an ortholog of the High-Affinity K<sup>+</sup> Transporter1,  
658 *HKT1*. *HKT1* has previously been linked in the evolution of salt tolerance adaptation in coastal  
659 populations of *Arabidopsis thaliana* (Fig. 5D; Rus et al. 2006; Baxter et al. 2010).

660

661 ***Caveats, Limitations, and Future Directions***

662 There are important caveats and concerns to consider in the interpretation of the results of our  
663 study. One of the foremost caveats of the study is its narrow scope. We only evaluated gene  
664 expression differences between one inbred line per ecotype, at two field sites, and for gene  
665 expression at one time point. Despite these drawbacks, this is the first study that we are aware of  
666 to evaluate allele-specific expression in the field between known locally adapted populations  
667 (Voelckel et al. 2017), which allowed us to detect novel *cis* x habitat and *trans* x habitat  
668 interaction (Fig. 4; Table S6). The major outstanding questions include how variable gene  
669 expression is across populations, field sites, and tissue types? In the future, it will be critical to  
670 evaluate gene expression at different time points and across tissue types to gain a more  
671 comprehensive understanding of how ecotypic differences in gene expression manifest  
672 throughout development under natural field conditions.

673  
674 Perhaps, the greatest challenge for interpreting gene expression results from reciprocal transplant  
675 experiments is understanding how patterns of expression actually contribute to phenotypes and  
676 fitness across habitats. Fitness trade-offs that are associated with local adaptation could  
677 potentially be caused by any type of gene expression pattern. Constitutive expression differences  
678 between ecotypes could cause stable phenotypic differences that are beneficial in one habitat but  
679 deleterious in another. Gene expression characterized by genotype x environment interactions  
680 could cause fitness trade-offs, but just as likely could mitigate trade-offs by helping ecotypes  
681 maintain homeostasis across habitats.

682  
683 Until recently, studies of gene regulation have for the most part been limited to the laboratory  
684 setting. Coupling those studies with reciprocal transplant experiments to better understand local

685 adaptation is still rare (Kenkel & Matz 2016; Lohman et al. 2017; Voelckel et al. 2017). Allele-  
686 specific expression is clearly an important tool for understanding the evolution of regulatory  
687 differences between locally adapted populations, ecotypes, and species. However, we hope that  
688 future reciprocal transplant experiments will go beyond RNA-sequencing by also examining  
689 genotypic differences in genome-wide patterns of chromatin remodeling and protein translation  
690 across divergent habitats (Rodgers-Melnick et al. 2016; Voelckel et al. 2017).

691

## 692 **DATA ACCSSIBILITY**

693 The assembled reference transcriptome and normalized count data for all transcripts in all  
694 individuals has been archived at Data Dryad (see DOI: <https://doi.org/10.5061/dryad.57d6118>).

695

## 696 **ACKNOWLEDGMENTS**

697

698 We thank D. Des Marais, J. Tung, J. Puzey, J. Friedman, R. Guerrero, R. Rellán-Álvarez, J.  
699 Lasky, and six anonymous reviewers for comments that helped to improve our manuscript. We  
700 thank K. Childs and J. Lovell for guidance with expression analyses, B. Blackman and E.  
701 Patterson for starting seeds for us at UC Berkeley, and D. Popovic for assistance in field  
702 planting. The Bodega Marine Reserve and the Pepperwood Preserve kindly allowed us to  
703 conduct this reciprocal transplant field experiment. Funding was provided by Michigan State  
704 University through a start-up package to DBL. The authors declare no conflicts of interest.

705

## 706 **REFERENCES**

707

708 Abzhanov A, Protas M, Grant BR *et al.* (2004) Bmp4 and morphological variation of beaks in  
709 Darwin's finches. *Science*, **305**, 1462-1465.

710

711 Adrion JR, Hahn MW, Cooper BS (2015) Revisiting classic clines in *Drosophila melanogaster*  
712 in the age of genomics. *Trends in Genetics*, **31**, 434-444.

713

714 Aguilar-Rangel MR, Montes RA, González-Segovia E *et al.* (2017) Allele specific expression  
715 analysis identifies regulatory variation associated with stress-related genes in the Mexican  
716 highland maize landrace Palomero Toluqueño. *PeerJ*, **23**, 5e3737.

717

718 Ågren, J, Oakley CG, McKay JK *et al.* (2013) Genetic mapping of adaptation reveals fitness  
719 trade-offs in *Arabidopsis thaliana*. *Proceedings of the National Academy of Sciences*, **110**,  
720 21077-21087.

721

722 Alexa A, Rahnenführer J (2015) Gene set enrichment analysis with topGO. [http://www.mpi-](http://www.mpi-sb.mpg.de/~alexa)  
723 [sb.mpg.de/~alexa](http://www.mpi-sb.mpg.de/~alexa)

724

725 Anderson JT, Willis JH, Mitchell-Olds T (2011) Evolutionary genetics of plant adaptation.  
726 *Trends in Genetics*, **27**, 258-266.

727

728 Anderson JT, Lee CR, Rushworth C *et al.* (2013) Genetic tradeoffs and conditional neutrality  
729 contribute to local adaptation. *Molecular Ecology*, **22**, 699-708.

730

731 Andrews S (2015) FastQC v0.11.3. A quality control tool for high throughput sequence data.  
732 <http://www.bioinformatics.babraham.ac.uk/projects/fastqc/>  
733

734 Ayala D, Guerrero RF, Kirkpatrick M (2013) Reproductive isolation and local adaptation  
735 quantified for a chromosome inversion in a malaria mosquito. *Evolution*, **67**, 946-958.  
736

737 Baack E, Melo MC, Rieseberg LH, *et al.* (2016) The origins of reproductive isolation in plants.  
738 *New Phytol*, **207**, 207, 968-984.  
739

740 Barrett RD, Rogers SM, Schluter D (2009) Environment specific pleiotropy facilitates  
741 divergence at the Ectodysplasin locus in threespine stickleback. *Evolution*, **63**, 2831-2837.  
742

743 Baxter I, Brazelton JN, Yu D *et al.* (2010) A coastal cline in sodium accumulation in  
744 *Arabidopsis thaliana* is driven by natural variation of the sodium transporter *AtHKT1;1*. *PLoS*  
745 *Genetics*, **6**, e1001193.  
746

747 Bi R, Liu P (2016) Sample size calculation while controlling false discovery rate for differential  
748 expression analysis with RNA-sequencing experiments. *BMC Bioinformatics*, **17**, 146.  
749

750 Bell GD, Kane NC, Rieseberg LH, Adams KL (2013) RNA-seq analysis of allele-specific  
751 expression, hybrid effects, and regulatory divergence in hybrids compared with their parents  
752 from natural populations. *Genome Biology and Evolution*, **5**, 1309-1323.  
753

754 Bolger AM, Lohse M, Usadel B (2014) Trimmomatic: a flexible trimmer for Illumina sequence  
755 data. *Bioinformatics*, **30**, 2114-2120.

756

757 Bono LM, Smith LB, Pfennig DW, Burch CL (2017) The emergence of performance trade-offs  
758 during local adaptation: insights from experimental evolution. *Molecular Ecology*, **26**, 1720-  
759 1733.

760

761 Brandvain Y, Kenney AM, Flagel L *et al.* (2014) Speciation and introgression between *Mimulus*  
762 *nasutus* and *Mimulus guttatus*. *PLoS Genetics*, **10**, e1004410.

763

764 Cassone BJ, Molloy MJ, Cheng C *et al.* (2011) Divergent transcriptional response to thermal  
765 stress by *Anopheles gambiae* larvae carrying alternative arrangements of inversion 2La.  
766 *Molecular Ecology*, **20**, 2567-2580.

767

768 Charlesworth D, Willis JH (2009) The genetics of inbreeding depression. *Nature Review*  
769 *Genetics*, **10**, 783-796.

770

771 Cheng C, White BJ, Kamdem C *et al.* (2012) Ecological genomics of *Anopheles gambiae* along a  
772 latitudinal cline: a population-resequencing approach. *Genetics*, **190**, 1417-1432.

773

774 Colosimo PF, Hosemann KE, Balabhadra S *et al.* (2005) Widespread parallel evolution in  
775 sticklebacks by repeated fixation of ectodysplasin alleles. *Science*, **307**, 1928-1933.

776

777 Coolon JD, McManus CJ, Stevenson KR *et al.* (2014) Tempo and mode of regulatory evolution  
778 in *Drosophila*. *Genome Research*, **24**, 797-808.

779

780 Clausen J (1951) Stages in the evolution of plant species. *Cornell University Press*. Ithaca NY,  
781 USA.

782

783 Corbin JD, Thomsen MA, Dawson TE, D'Antonio CM (2005) Summer water use by California  
784 coastal prairie grasses: fog, drought, and community composition. *Oecologia*, **145**, 511–521.

785

786 Cowles CR, Hirschhorn JN, Altshuler D *et al.* (2002) Detection of regulatory variation in mouse  
787 genes. *Nature Genetics*, **32**, 432-437.

788

789 Cubillos FA, Stegle O, Grondin C *et al.* (2014) Extensive *cis*-regulatory variation robust to  
790 environmental perturbation in *Arabidopsis*. *Plant Cell*, **26**, 4298-4310.

791

792 Dayan DI, Crawford DL, Oleksiak MF (2015) Phenotypic plasticity in gene expression  
793 contributes to divergence of locally adapted populations of *Fundulus heteroclitus*. *Molecular*

794 *Ecology*, **24**, 3345-3359.

795

796 de Meaux J, Goebel U, Pop A *et al.* (2005) Allele-specific assay reveals functional variation in  
797 the chalcone synthase promoter of *Arabidopsis thaliana* that is compatible with neutral

798 evolution. *Plant Cell*, **17**, 676-690.

799

- 800 Des Marais DL, Hernandez KM, Juenger TE (2013) Genotype-by-environment interaction and  
801 plasticity: exploring genomic responses of plants to the abiotic environment. *Annual Review of*  
802 *Ecology, Evolution, and Systematics*, **44**, 5-29.
- 803
- 804 Des Marais DL, Guerrero RF, Lasky JR, Scarpino SV (2017) Topological features of a gene co-  
805 expression network predict patterns of natural diversity in environmental response. *Proceedings*  
806 *of the Royal Society B*, **284**, 20170914.
- 807
- 808 Dieckmann U, Doebeli M (1999) On the origin of species by sympatric speciation. *Nature*, **400**,  
809 354–357.
- 810
- 811 Dobzhansky T. 1951. Genetics and the Origin of Species (3rd ed.). *Columbia University Press*.  
812 New York, NY, USA.
- 813
- 814 Dobzhansky T. 1970. Genetics of the Evolutionary Process. *Columbia University Press*. New  
815 York, NY, USA.
- 816
- 817 Egea I, Pineda B, Ortíz-Atienza A, *et al.* (2018) The *SICBL10* calcineurin B-like protein ensures  
818 plant growth under salt stress by regulating Na<sup>+</sup> and Ca<sup>2+</sup> homeostasis. *Plant Physiology*. *In*  
819 *Press*, DOI: <https://doi.org/10.1104/pp.17.01605>
- 820
- 821 Faria R and Navarro A (2010) Chromosomal speciation revisited: rearranging theory with pieces  
822 of evidence. *Trends in Ecology & Evolution*, **25**, 660-669.



823

824 Fuller ZL, Haynes GD, Richards S *et al.* (2016) Genomics of natural populations: how  
825 differentially expressed genes shape the evolution of chromosomal inversions in *Drosophila*  
826 *pseudoobscura*. *Genetics*, **204**, 287-301.

827

828 Friedman J, Willis JH (2013) Major QTLs for critical photoperiod and vernalization underlie  
829 extensive variation in flowering in the *Mimulus guttatus* species complex. *New Phytologist*, **199**,  
830 571-583.

831

832 Friedman J (2014) Genetic determinants and epistasis for life history trait differences in the  
833 common monkeyflower, *Mimulus guttatus*. *Journal of Heredity*, **105**, 816-827.

834

835 Friedman J, Twyford AD, Willis JH *et al.* (2015) The extent and genetic basis of phenotypic  
836 divergence in life history traits in *Mimulus guttatus*. *Molecular Ecology*, **24**, 111-122.

837

838 Gardner KM, Latta RG (2006) Identifying loci under selection across contrasting environments  
839 in *Avena barbata* using quantitative trait locus mapping. *Molecular Ecology*, **15**, 1321-1333.

840

841 Ghalambor CK, McKay JK, Carroll SP *et al.* (2007) Adaptive versus non-adaptive phenotypic  
842 plasticity and the potential for contemporary adaptation in new environments. *Functional*  
843 *Ecology*, **21**, 394-407.

844

- 845 Gibson G (2008) The environmental contribution to gene expression profiles. *Nature Reviews*  
846 *Genetics*, **9**, 575-581.
- 847
- 848 Gibson G, Riley-Berger R, Harshman L *et al.* (2004) Extensive sex-specific nonadditivity of  
849 gene expression in *Drosophila melanogaster*. *Genetics*, **167**, 1791-1799.
- 850
- 851 Gould BA, Chen Y, Lowry DB (2017) Pooled ecotype sequencing reveals candidate genetic  
852 mechanisms for adaptive differentiation and reproductive isolation. *Molecular Ecology*, **26**, 163-  
853 177.
- 854
- 855 Grabherr MG, Haas BJ, Yassour M *et al.* (2011) Full-length transcriptome assembly from RNA-  
856 Seq data without a reference genome. *Nature Biotechnology*, **29**, 644-652.
- 857
- 858 Guo M, Yang S, Rupe M, Hu B, Bickel DR, Arthur L, Smith O (2008) Genome-wide allele-  
859 specific expression analysis using massively parallel signature sequencing (MPSS™) reveals cis-  
860 and trans-effects on gene expression in maize hybrid meristem tissue. *Plant Molecular Biology*,  
861 **66**, 551-563.
- 862
- 863 Hall MC, Willis JH (2006) Divergent selection on flowering time contributes to local adaptation  
864 in *Mimulus guttatus* populations. *Evolution*, **60**, 2466-2477.
- 865

866 Hall MC, Basten C, Willis JH (2006) Pleiotropic quantitative trait loci contribute to population  
867 divergence in traits associated with life-history variation in *Mimulus guttatus*. *Genetics*, **172**,  
868 1829-1844.

869

870 Hall MC, Lowry DB, Willis JH (2010) Is local adaptation in *Mimulus guttatus* caused by  
871 tradeoffs at individual loci? *Molecular Ecology* **19**, 2739-2753.

872

873 Hedrick PW, Ginevan ME, Ewing EP. 1976. Genetic polymorphism in heterogeneous  
874 environments. *Annual Review of Ecology and Systematics*, **7**, 1-32.

875

876 Hedrick PW (1986) Genetic polymorphism in heterogeneous environments: a decade later.  
877 *Annual Review of Ecology and Systematics*, **17**, 535-566.

878

879 Hellsten U, Wright KM, Jenkins J *et al.* (2013) Fine-scale variation in meiotic recombination in  
880 *Mimulus* inferred from population shotgun sequencing. *Proceedings of the National Academy of*  
881 *Sciences*, **110**, 19478-19482.

882

883 Hereford J (2009) A quantitative survey of local adaptation and fitness trade-offs. *American*  
884 *Society of Naturalists*, **173**, 579-588.

885

886 Hoekstra HE, Hirschmann RJ, Bunday RA *et al.* (2006) A single amino acid mutation  
887 contributes to adaptive beach mouse color pattern. *Science*, **313**, 101-104.

888

- 889 Holeski L, Monnahan P, Koseva B *et al.* (2014) A high-resolution genetic map of yellow  
890 monkeyflower identifies chemical defense QTLs and recombination rate variation. *G3: Genes,*  
891 *Genomes, Genetics*, **4**, 813-821.
- 892
- 893 Hoffmann AA, Rieseberg LH (2008) Revisiting the impact of inversions in evolution: From  
894 population genetic markers to drivers of adaptive shifts and speciation? *Annual Review of*  
895 *Ecology, Evolution, and Systematics*, **39**, 21-42.
- 896
- 897 Jakab, G, Ton, J, Flors, V, Zimmerli, L, Métraux, J-P, Mauch-Mani, B. (2005) Enhancing  
898 Arabidopsis Salt and Drought Stress Tolerance by Chemical Priming for Its Abscisic Acid  
899 Responses. *Plant Physiology* 1:267-274.
- 900
- 901 Ji H, Pardo JM, Batelli G *et al.* (2013) The Salt Overly Sensitive (SOS) pathway: established and  
902 emerging roles. *Molecular Plant*, **6**, 275-286.
- 903
- 904 Joron M, Frezal L, Jones RT *et al.* (2011) Chromosomal rearrangements maintain a polymorphic  
905 supergene controlling butterfly mimicry. *Nature*, **477**, 203-206.
- 906
- 907 Kang HK, Nam KH (2016) Reverse function of ROS-induced CBL10 during salt and drought  
908 stress responses. *Plant Science*, **243**, 49-55.
- 909
- 910 Kawecki TJ, Ebert D (2004) Conceptual issues in local adaptation. *Ecology Letters*, **7**, 1225-  
911 1241.

912

913 Kenkel CD, Matz MV (2016) Gene expression under chronic heat stress in populations of the  
914 mustard hill coral (*Porites astreoides*) from different thermal environments. *Nature Ecology and*  
915 *Evolution*, **1**, 0014.

916

917 Kim BG, Waadt R, Cheong YH, Pandey GK, Dominguez-Solis JR, Schültke S, Lee SC, Kudla J,  
918 Luan S. (2007) The calcium sensor CBL10 mediates salt tolerance by regulating ion homeostasis  
919 in *Arabidopsis*. *The Plant Journal*, **52**, 473-484.

920

921 Kirkpatrick M, Barton NH (2006) Chromosome inversions, local adaptation and speciation.  
922 *Genetics*, **173**, 419-434.

923

924 Kirkpatrick M, Barrett B (2015) Chromosome inversions, adaptive cassettes and the evolution of  
925 species' ranges. *Molecular Ecology*, **24**, 2046-2055.

926

927 Kirkpatrick M, Kern A (2012) Where's the money? Inversions, genes, and the hunt for genomic  
928 targets of selection. *Genetics*, **190**, 1153-1155.

929

930 Kirkpatrick M (2010) How and why chromosome inversions evolve. *PLOS Biology*, **8**, e1000501

931

932 Langfelder P, Horvath S (2008) WGCNA: an R package for weighted correlation network  
933 analysis. *BMC Bioinformatics*, **9**, 559.

934

935 Kunte K, Zhang W, Tenger-Trolander A et al. (2014) Doublesex is a mimicry supergene. *Nature*,  
936 **507**, 229-232.  
937  
938 Langmead B, Salzberg SL (2012) Fast gapped-read alignment with Bowtie 2. *Nature Methods*, **9**,  
939 357-359.  
940  
941 Langmead B, Trapnell C, Pop M *et al.* (2009) Ultrafast and memory-efficient alignment of short  
942 DNA sequences to the human genome. *Genome Biology*, **10**, R25.  
943  
944 Law CW, Chen Y, Shi W *et al.* (2014) Precision weights unlock linear model analysis tools for  
945 RNA-seq read counts. *Genome Biology*, **15**, R29.  
946  
947 Lee CR, Wang B, Mojica JP *et al.* (2017) Young inversion with multiple linked QTLs under  
948 selection in a hybrid zone. *Nature Ecology and Evolution*, **1**, 0119.  
949  
950 Leinonen PH, Remington DL, Leppala *et al.* (2013) Genetic basis of local adaptation and  
951 flowering time variation in *Arabidopsis lyrata*. *Molecular Ecology*, **22**, 709-723.  
952  
953 Leimu R, Fischer M (2008) A meta-analysis of local adaptation in plants. *PLoS One*, **3**, e4010.  
954  
955 Levene H (1953) Genetic equilibrium when more than one ecological niche is available. *The*  
956 *American Naturalist*, **87**, 331-333.  
957

- 958 Lohman B, Stutz W, Bolnick D (2017) Gene expression stasis and plasticity following migration  
959 into a foreign environment. *bioRxiv*, 121608.  
960
- 961 Lowry DB, Rockwood JH, Willis JH (2008) Ecological reproductive isolation of coast and  
962 inland races of *Mimulus guttatus*. *Evolution*, **62**, 2196-2214.  
963
- 964 Lowry DB, Hall MC, Salt DE *et al.* (2009) Genetic and physiological basis of adaptive salt  
965 tolerance divergence between coastal and inland *Mimulus guttatus*. *New Phytol*, **183**, 776-788.  
966
- 967 Lowry DB, Willis JH (2010) A widespread chromosomal inversion polymorphism contributes to  
968 a major life-history transition, local adaptation, and reproductive isolation. *PLOS Biology*, **8**,  
969 e1000500.  
970
- 971 Lovell JT, Schwartz S, Lowry DB *et al.* (2016) Drought responsive gene expression regulatory  
972 divergence between upland and lowland ecotypes of a perennial C4 grass. *Genome Research*, **26**,  
973 510-518.  
974
- 975 Mack KL, Campbell P, Nachman MW (2016) Gene regulation and speciation in house mice.  
976 *Genome Research*, **26**, 451-461.  
977
- 978 Marquès-Bonet T, Cáceres M, Bertranpetit J *et al.* (2004) Chromosomal rearrangements and the  
979 genomic distribution of gene-expression divergence in humans and chimpanzees. *Trends in*  
980 *Genetics*, **20**, 524-529.

981

982 Okamoto, K, Ueda, H, Shimada, T *et al.* (2015) An ABC transporter B family protein, *ABCB19*,

983 is required for cytoplasmic streaming and gravitropism of the inflorescence stems. *Plant*

984 *Signaling & Behavior*, 3: e1010947

985

986 Oneal E, Lowry DB, Wright KM *et al.* (2014) Divergent population structure and climate

987 associations of a chromosomal inversion polymorphism across the *Mimulus guttatus* species

988 complex. *Molecular Ecology*, **23**, 2844-2860.

989

990 Puzey JR, Willis JH, Kelly JK (2017) Population structure and local selection yield high

991 genomic variation in *Mimulus guttatus*. *Molecular Ecology*, **26**, 519-535.

992

993 Qiu QS, Guo Y, Dietrich MA, Schumaker KS, Zhu JK (2002) Regulation of SOS1, a plasma

994 membrane Na<sup>+</sup>/H<sup>+</sup> exchanger in *Arabidopsis thaliana*, by SOS2 and SOS3. *Proceedings of the*

995 *National Academy of Sciences*, **99**, 8436-8441.

996

997 Quan R, Lin H, Mendoza I, *et al.* (2007) SCABP8/CBL10, a putative calcium sensor, interacts

998 with the protein kinase SOS2 to protect *Arabidopsis* shoots from salt stress. *The Plant Cell*, **19**,

999 1415-1431.

1000

1001 R. Core Team (2012) R: A language and environment for statistical computing. (available at

1002 <http://www.r-project.org/.le>).

1003



- 1004 Rieseberg LH (2001) Chromosomal rearrangements and speciation. *Trends in Ecology &*  
1005 *Evolution*, **16**, 351-358.
- 1006
- 1007 Ritchie ME, Phipson B, Wu D *et al.* (2015) limma powers differential expression analyses for  
1008 RNA-sequencing and microarray studies. *Nucleic Acids Research*, **43**, e47.
- 1009
- 1010 Robinson M, Oshlack A (2010) A scaling normalization method for differential expression  
1011 analysis of RNA-seq data. *Genome Biology*, **11**, R25.
- 1012
- 1013 Robinson MD, McCarthy DJ, Smyth GK (2010) edgeR: a Bioconductor package for differential  
1014 expression analysis of digital gene expression data. *Bioinformatics*, **26**, 139-140.
- 1015
- 1016 Rockman MV, Kruglyak L (2006) Genetics of global gene expression. *Nature Reviews Genetics*,  
1017 **7**, 862-872.
- 1018
- 1019 Rodgers-Melnick E, Vera DL, Bass HW, Buckler ES (2016) Open chromatin reveals the  
1020 functional maize genome. *Proceedings of the National Academy of Sciences*, **113**, E3177-3184.
- 1021
- 1022 Rutherford SL (2003) Between genotype and phenotype: protein chaperones and evolvability.  
1023 *Nature Review Genetics*, **4**, 263-274.
- 1024
- 1025 Rus A, Baxter I, Muthukumar B, *et al.* (2006) Natural variants of *AtHKT1* enhance Na<sup>+</sup>  
1026 accumulation in two wild populations of *Arabidopsis*. *PLoS Genetics*, **2**, e210.

1027

1028 Said I, Byrne A, Serrano V, Cardeno C, Vollmers C, Corbett-Detig R (2018) Linked genetic  
1029 variation and not genome structure causes widespread differential expression associated with  
1030 chromosomal inversions. *Proceedings of the National Academy of Sciences*, **2**, 201721275.

1031

1032 Selby JP, Jeong AL, Toll K, Wright KM, Lowry DB (2014) Methods and discoveries in the  
1033 pursuit of understanding the genetic basis of adaptation to harsh environments in *Mimulus*. In  
1034 *Plant Ecology and Evolution in Harsh Environments* (pp. 243-265). *NOVA Science Publishers*.  
1035 Hauppauge, NY, USA.

1036

1037 Shen Y, Garcia T, Pabuwal V, et al. (2013) Alternative strategies for development of a reference  
1038 transcriptome for quantification of allele specific expression in organisms having sparse genomic  
1039 resources. *Comp. Biochem. Physiol. - Part D Genomics Proteomics*, **8**, 11–16.

1040

1041 Shi H, Ishitani M, Kim C, Zhu JK (2000) The *Arabidopsis thaliana* salt tolerance gene *SOS1*  
1042 encodes a putative Na<sup>+</sup>/H<sup>+</sup> antiporter. *Proceedings of the National Academy of Sciences*, **97**,  
1043 6896-6901.

1044

1045 Sobel JM, Chen GF, Watt LR *et al.* (2010) The biology of speciation. *Evolution*, **64**, 295-315.

1046

1047 Smyth GK, Ritchie M, Thorne N (2015) Linear models for microarray and RNA-Seq data user's  
1048 guide. R, doi:10.1093/nar/gkv007.

1049

1050 Stupar RM, Springer NM (2006) *Cis*-transcriptional variation in maize inbred lines B73 and  
1051 Mo17 leads to additive expression patterns in the F1 hybrid. *Genetics*, **173**, 2199-2210.  
1052

1053 Steige KA, Reimegård J, Koenig D *et al.* (2015) *Cis*-regulatory changes associated with a recent  
1054 mating system shift and floral adaptation in *Capsella*. *Molecular Biology and Evolution*, **32**,  
1055 2501-2514.  
1056

1057 Steige KA, Laenen B, Reimegård J (2017) Genomic analysis reveals major determinants of *cis*-  
1058 regulatory variation in *Capsella grandiflora*. *Proceedings of the National Academy of Sciences*,  
1059 **114**, 1087-1092.  
1060

1061 Stevenson KR, Coolon JD, Wittkopp PJ (2013) Sources of bias in measures of allele-specific  
1062 expression derived from RNA-seq data aligned to a single reference genome. *BMC genomics*, **14**,  
1063 536.  
1064

1065 Swanson-Wagner R, Jia Y, De Cook R *et al.* (2006) All possible modes of gene action are  
1066 observed in a global comparison of gene expression in a maize f1 hybrid and its inbred parents.  
1067 *Proceedings of the National Academy of Sciences* **103**, 6805–6810.  
1068

1069 Tang RJ, Yang Y, Yang L, *et al.* (2014) Poplar calcineurin B-like proteins *PtCBL10A* and  
1070 *PtCBL10B* regulate shoot salt tolerance through interaction with *PtSOS2* in the vacuolar  
1071 membrane. *Plant Cell and Environment*, **37**, 573–588  
1072

- 1073 Thompson MJ, Jiggins CD 2014. Supergenes and their role in evolution. *Heredity*, **113**, 1–8.  
1074
- 1075 Thorvaldsdóttir H, Robinson JT, Mesirov JP (2015) Integrative Genomics Viewer (IGV): high-  
1076 performance genomics data visualization and exploration. *Briefings in Bioinformatics*, **14**, 1476-  
1077 1486.  
1078
- 1079 Tung J, Primus A, Bouley AJ, Severson TF, Alberts SC, Wray GA (2009) Evolution of a malaria  
1080 resistance gene in wild primates. *Nature*, **460**, 388-391.  
1081
- 1082 Twyford AD, Friedman J (2015) Adaptive divergence in the monkey flower *Mimulus guttatus* is  
1083 maintained by a chromosomal inversion. *Evolution*, **69**, 1476-1486.  
1084
- 1085 Twyford AD, Streisfeld MA, Lowry DB *et al.* Genomic studies on the nature of species:  
1086 adaptation and speciation in *Mimulus*. *Molecular Ecology*, **24**, 2601-2609.  
1087
- 1088 van Kleunen M (2007) Adaptive genetic differentiation in life-history traits between populations  
1089 of *Mimulus guttatus* with annual and perennial life-cycles. *Evolutionary Ecology*, **21**, 185-199.  
1090
- 1091 Verhoeven KJF, Poorter H, Nevo E *et al.* (2008) Habitat-specific natural selection at a  
1092 flowering-time QTL is a main driver of local adaptation in two wild barley populations.  
1093 *Molecular Ecology*, **17**, 3416-3424.  
1094

- 1095 Vickery RK (1952) A study of the genetic relationships in a sample of the *Mimulus guttatus*  
1096 complex. PhD Dissertation, Stanford Univ., California.  
1097
- 1098 Voelckel C, Gruenheit N, Lockhart P (2017) Evolutionary transcriptomics and proteomics:  
1099 Insight into plant adaptation. *Trends in Plant Science*, **22**, 462-471.  
1100
- 1101 Wadgyamar S, Lowry DB, Gould BA *et al.* (2017) Identifying targets and agents of selection:  
1102 innovative methods to evaluate the processes that contribute to local adaptation. *Methods in*  
1103 *Ecology and Evolution*, **8**, 738-749.  
1104
- 1105 Wang M, Uebbing S, Ellegren H (2017) Bayesian inference of allele-specific gene expression  
1106 indicates abundant *cis*-regulatory variation in natural flycatcher populations. *Genome Biology*  
1107 *and Evolution*, **9**, 1266-1279.  
1108
- 1109 Wittkopp PJ, Haerum BK, Clark AG (2004) Evolutionary changes in *cis* and *trans* gene  
1110 regulation. *Nature*, **430**, 85-88.  
1111
- 1112 Wu CA, Lowry DB, Nutter LI *et al.* (2010) Natural variation for drought-response traits in the  
1113 *Mimulus guttatus* species complex. *Oecologia*, **162**, 23-33.  
1114
- 1115 Xiong L, Lee H, Ishitani M *et al.* (2002) Regulation of osmotic stress-responsive gene  
1116 expression by the LOS6/ABA1 Locus in *Arabidopsis*. *The Journal of Biological Chemistry*, **277**,  
1117 8588–8596.

1118

1119 Zhang X, Borevitz JO (2009) Global analysis of allele-specific expression in *Arabidopsis*

1120 *thaliana*. *Genetics*, **182**, 943-954.

1121

1122 **DATA ACCESSIBILITY**

1123 RNA-sequence data are deposited are available through the NCBI Sequence Read Archive under

1124 project identifier XX.

1125

1126 **AUTHOR CONTRIBUTIONS**

1127 DBL designed and conducted the field experiment. YC conducted the laboratory work. BAG

1128 analyzed the data. DBL and BAG wrote the manuscript.

1129

1130

1131 **TABLES**

1132

1133 Table 1: Summary of model effects on expressed genes.

|                                    | Inversion 5<br>(246) |       | Inversion 8<br>(311) |       | Non-Inversion<br>(8805) |       | total<br>(9326) |
|------------------------------------|----------------------|-------|----------------------|-------|-------------------------|-------|-----------------|
| Differential Expression (model 1): | no.                  | LFC   | no.                  | LFC   | no.                     | LFC   | no.             |
| Genotypic DE                       | 201                  | 0.893 | 239                  | 0.932 | 6773                    | 0.86  | 7213            |
| Environmental DE                   | 185                  | 0.667 | 230                  | 0.808 | 6350                    | 0.729 | 6765            |
| Genotype by Environment            | <b>60*</b>           | 0.19  | 61                   | 0.213 | 1659                    | 0.196 | 1780            |
| Regulation effects (model 2):      |                      |       |                      |       |                         |       |                 |
| total DE genes                     | <b>204***</b>        |       | 232                  |       | 6490                    |       | 6962            |
| Cis regulation                     | 158                  | 1.023 | <b>198*</b>          | 1.04  | 5176                    | 1.04  | 5532            |
| Trans regulation                   | 106                  | 1.707 | 109                  | 1.628 | 3396                    | 1.229 | 3611            |

1134 \*significantly greater percentage than non-inversion regions at  $p < 0.05$ , \*\* $p < 0.01$ .

1135 LFC: average magnitude (abs) log<sub>2</sub> fold-change of genes with significant effects

1136

1137

1138

1139

1140 Table 2: Number and average effect size of differentially expressed genes within each habitat.

|                      | Coast       |       | Inland         |                 |
|----------------------|-------------|-------|----------------|-----------------|
|                      | no.         | LFC   | no.            | LFC             |
| Inversion 5 (246)    | 119         | 1.136 | 184            | 0.932           |
| Inversion 8 (311)    | <b>161*</b> | 1.092 | 210            | 0.993           |
| Non-Inversion (8805) | 3997        | 1.084 | 6195           | 0.897           |
| Total (9326)         | 4277        | 1.085 | <b>6589***</b> | <b>0.901***</b> |

1141 \*significantly greater than non-inversion regions at  $p < 0.05$

1142 \*\*\* significantly different than the coastal field site,  $p < 0.001$

1143 LFC: average magnitude (abs) log<sub>2</sub> fold-change of genes with significant effects

1144

1145

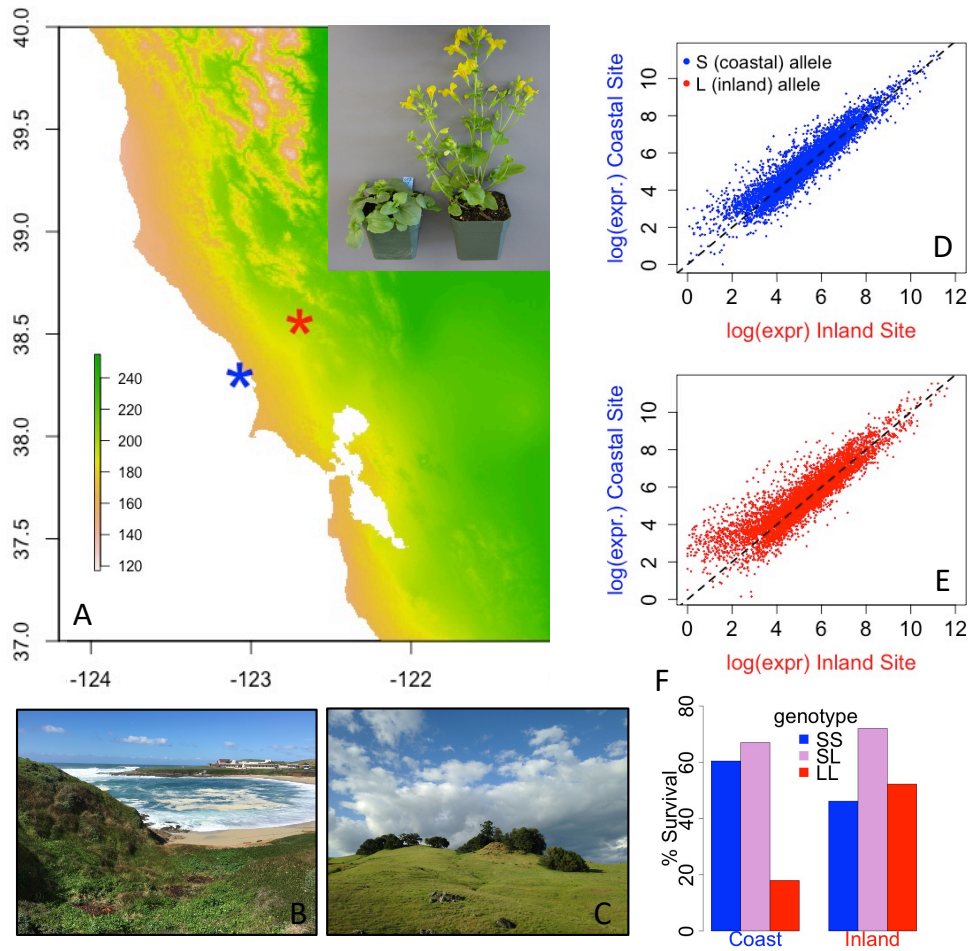

Fig. 1 A) Map of Northern California with the location of two field transplant sites. Colors represent mean temperature of the warmest quarter in degrees C x 10. Inset: left, coastal ecotype; right, inland ecotype. B) The coastal field site. C) The inland field site. D) SS parental gene expression at two field sites. E) LL parental gene expression at two field sites. F) Survival of parental and F1 (SL) plants at the two field sites.



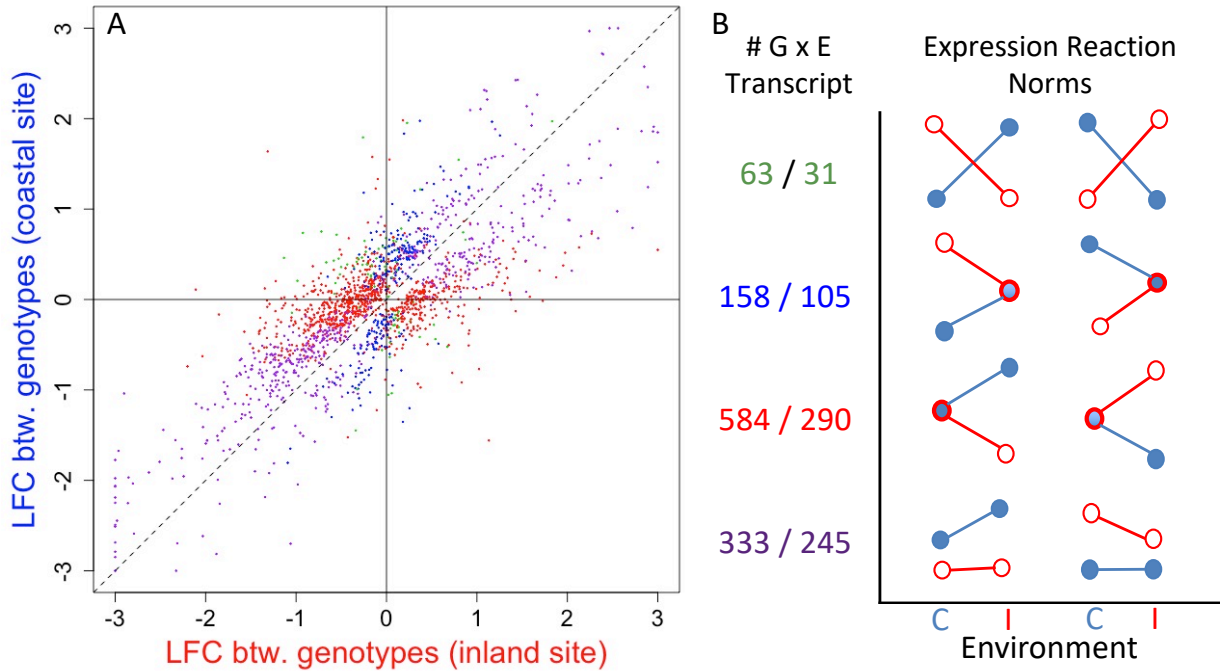

Fig. 2 A) Average log<sub>2</sub> fold-change (LFC) differences between parental genotypes for expressed transcripts at the two field sites. B) Expression reaction norms for inland (red) and coastal (blue) lines. The numbers correspond to the colored points in part A of the figure. LFC has been restricted to <3 and <-3 for graphing purposes. Note, 28 transcripts with ambiguous expression patterns have been excluded.

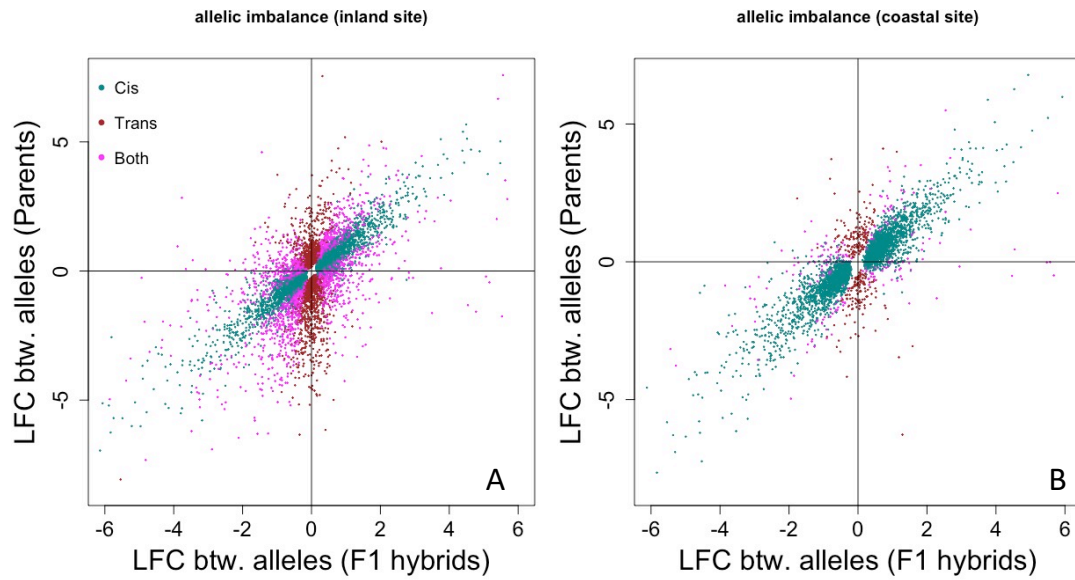

Fig.3. *Cis* and *trans* regulated transcripts detected at the coastal (A) and inland (B) field sites. Average log<sub>2</sub>-fold change (LFC) ratios are between inland and coastal alleles in the parental (y-axis) and F1 (x-axis) genetic backgrounds.

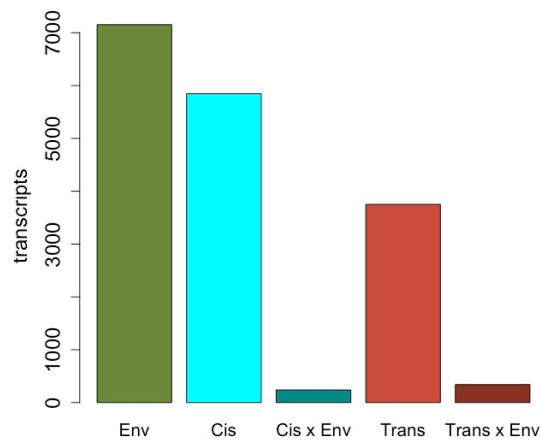

Fig.4. The frequency of significant model effects among all expressed transcripts.

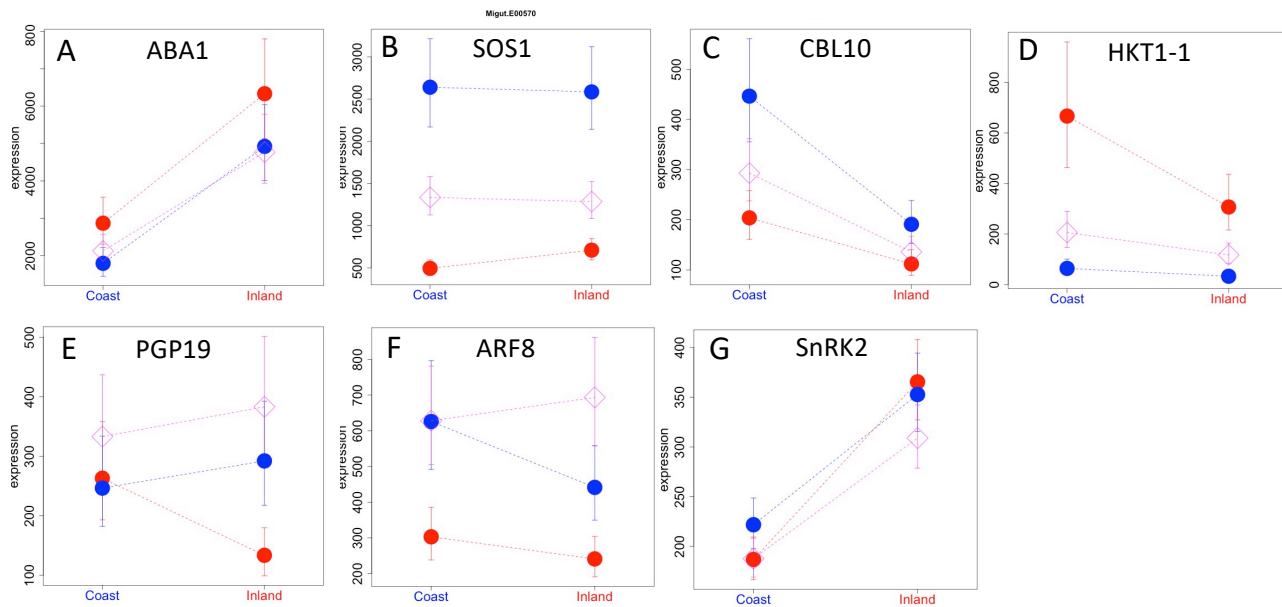

Fig.5 Reaction norms of expression at two field sites for seven candidate adaptive genes. A) ABA1 – abscisic acid deficient 1; B) SOS1 – salt overly-sensitive 1; C) CBL10 -calcineurin B-like protein 10; D) HKT1-1, high-affinity K<sup>+</sup> transporter (functions in salt tolerance); E) PGP19, p-glycoprotein 19 (functions in auxin transport); F) ARF8 – auxin response factor 8; G) SnRK2, Snf-related protein kinase (functions in salt tolerance); Red, inland genotype. Blue, coastal genotype. Pink, F1 hybrid.
